# Supplementary material for: The leaderless communication peptide (LCP) class of quorum-sensing peptides is broadly distributed among Firmicutes
Source: PubMed Central journal article supplement (PMC10518010; doi:10.1038/s41467-023-41719-3), 2023-09-23
Supplement: 41467_2023_41719_MOESM1_ESM.pdf [file 41467_2023_41719_MOESM1_ESM.pdf]

Supplementary Figure 1

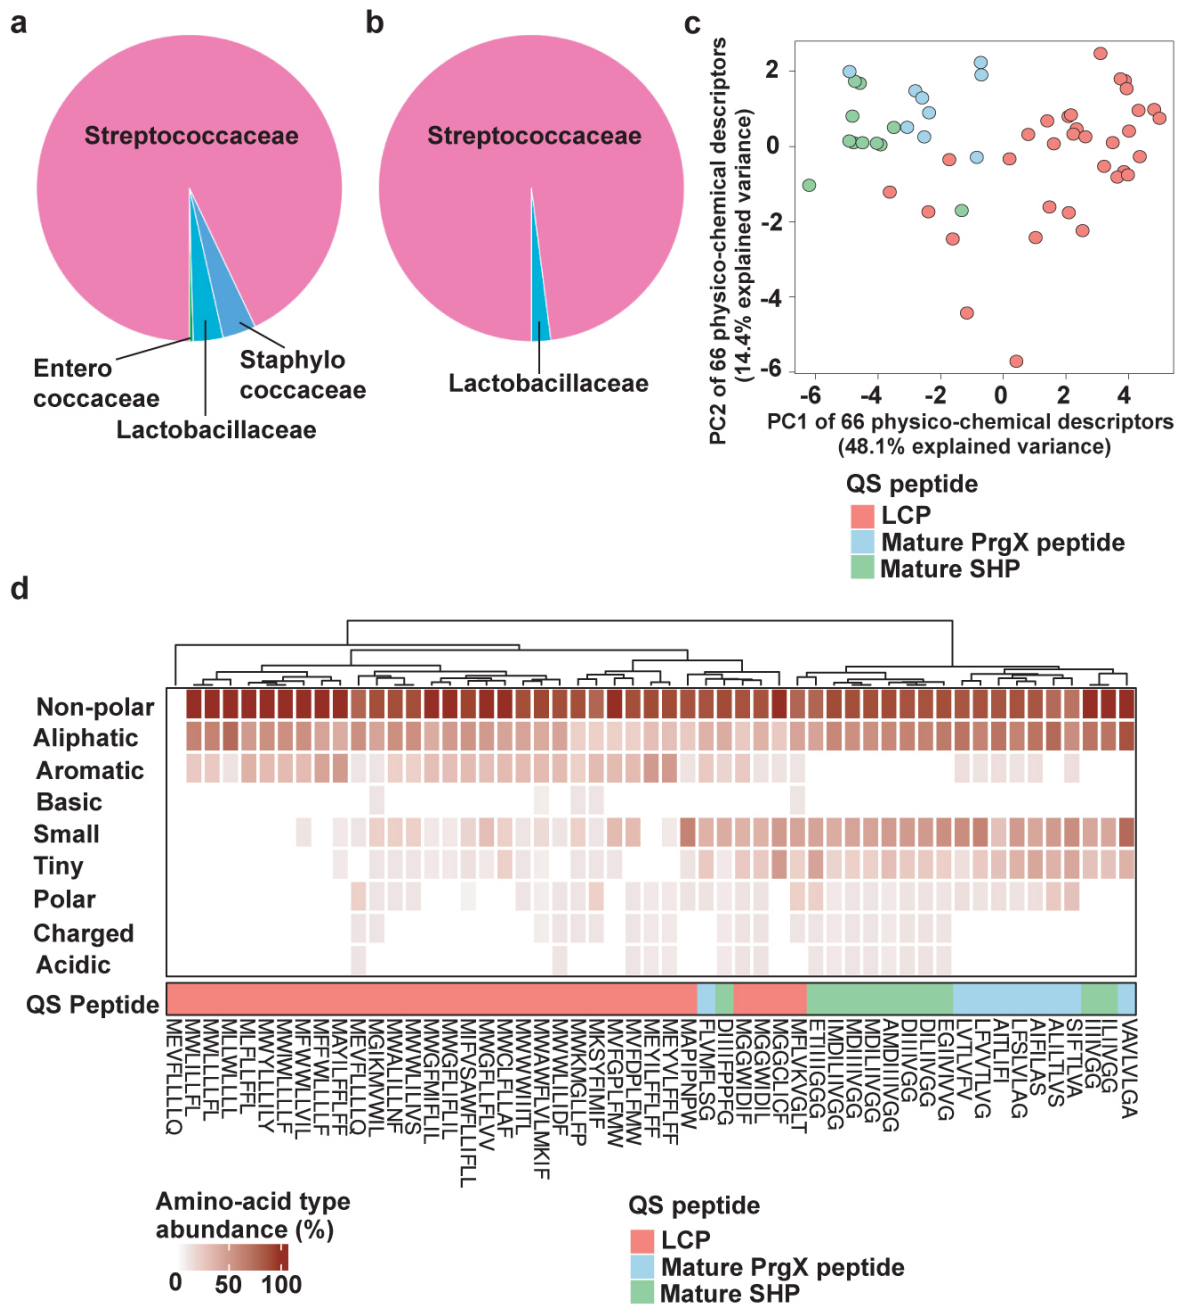

**Supplementary Figure 1.** The distribution of Rgg1-SHP (a) and Rgg2-SHP (b) systems in different bacterial taxa. c) Physico-chemical signatures of LCPs (red) and of PptAB-exported streptococcal SHPs (green) and enterococcal PrgX-like (blue) mature quorum sensing peptides. The panel displays the coordinates of each peptide sequence in the

two first principal components of the space of 66 physiochemical amino-acid descriptors (the 10 Blosum indices, 3 Cruciani properties, 6 FASGAI vectors, 10 Kidera factors, 3 MS-WHIM scores, 8 protFP descriptors, 8 ST-scales, 5 T-scales, 8 VHSE-scales and 5 Z-scales implemented in the 'Peptides' R package). **d)** Clustered heatmap representing the enrichment of each amino-acid type within LCPs (red), SHPs (green) and PrgX (blue): non-polar (A,C,F,G,I,L,M,P,V,W,Y), aromatic (F,H,W,Y), aliphatic (A,I,L,V), small (A,B,C,D,G,N,P,S,T,V), tiny (A,C,G,S,T), polar (D,E,H,K,N,Q,R,S,T,Z), charged (B,D,E,H,K,R,Z), acidic (B,D,E,Z) and basic (H,K,R).



**Supplementary Figure 2. Differential conservation of amino acids across regions of LCP clan receptors.** Structure-guided multiple sequence alignment of receptors paired with LCPs. Each row depicts a receptor sequence, labeled according to their species origin and their cognate LCP. The structural domains and the LCP-contacting residues of RopB from *S. pyogenes* are mapped onto corresponding sites of the alignment. The conservation level of each site is displayed in the bottom of the alignment, and the most conserved amino acids at each site are highlighted in different shades of blue.

### Supplementary Figure 3

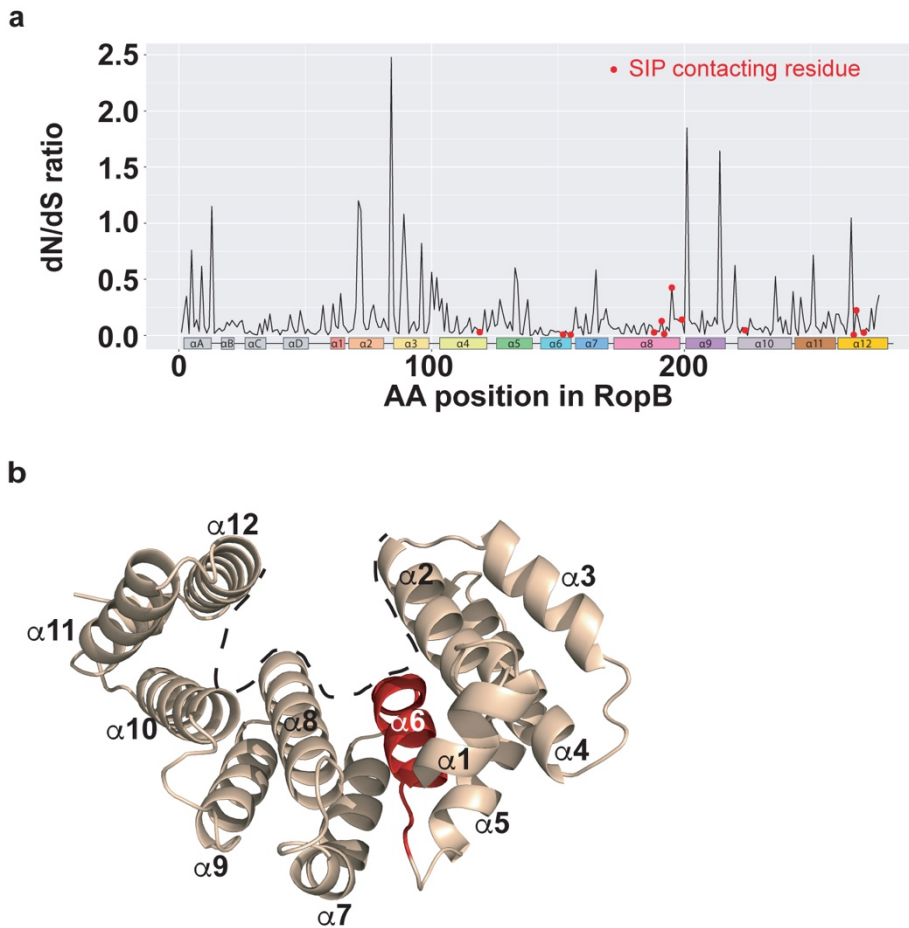

**Supplementary Figure 3. Differential selective pressure across regions of RopB clan receptors.** **a**, Site-wise dN/dS of each amino acid in the alignment in fig. S2 (the closer to 0, the higher the inferred purifying selection acting against amino acid substitution). Sites corresponding to LCP-contacting residues in RopB are highlighted in red. **b**, Structure of the LCP-binding pocket of RopB (PDB code: 6DQL). The boundary of the LCP-binding pocket is marked as dashed lines. The secondary structure (helices  $\alpha$ 1-12) of RopB-CTD is labeled and the highly conserved helix  $\alpha$ 6 is highlighted in red.



## Supplementary Figure 4

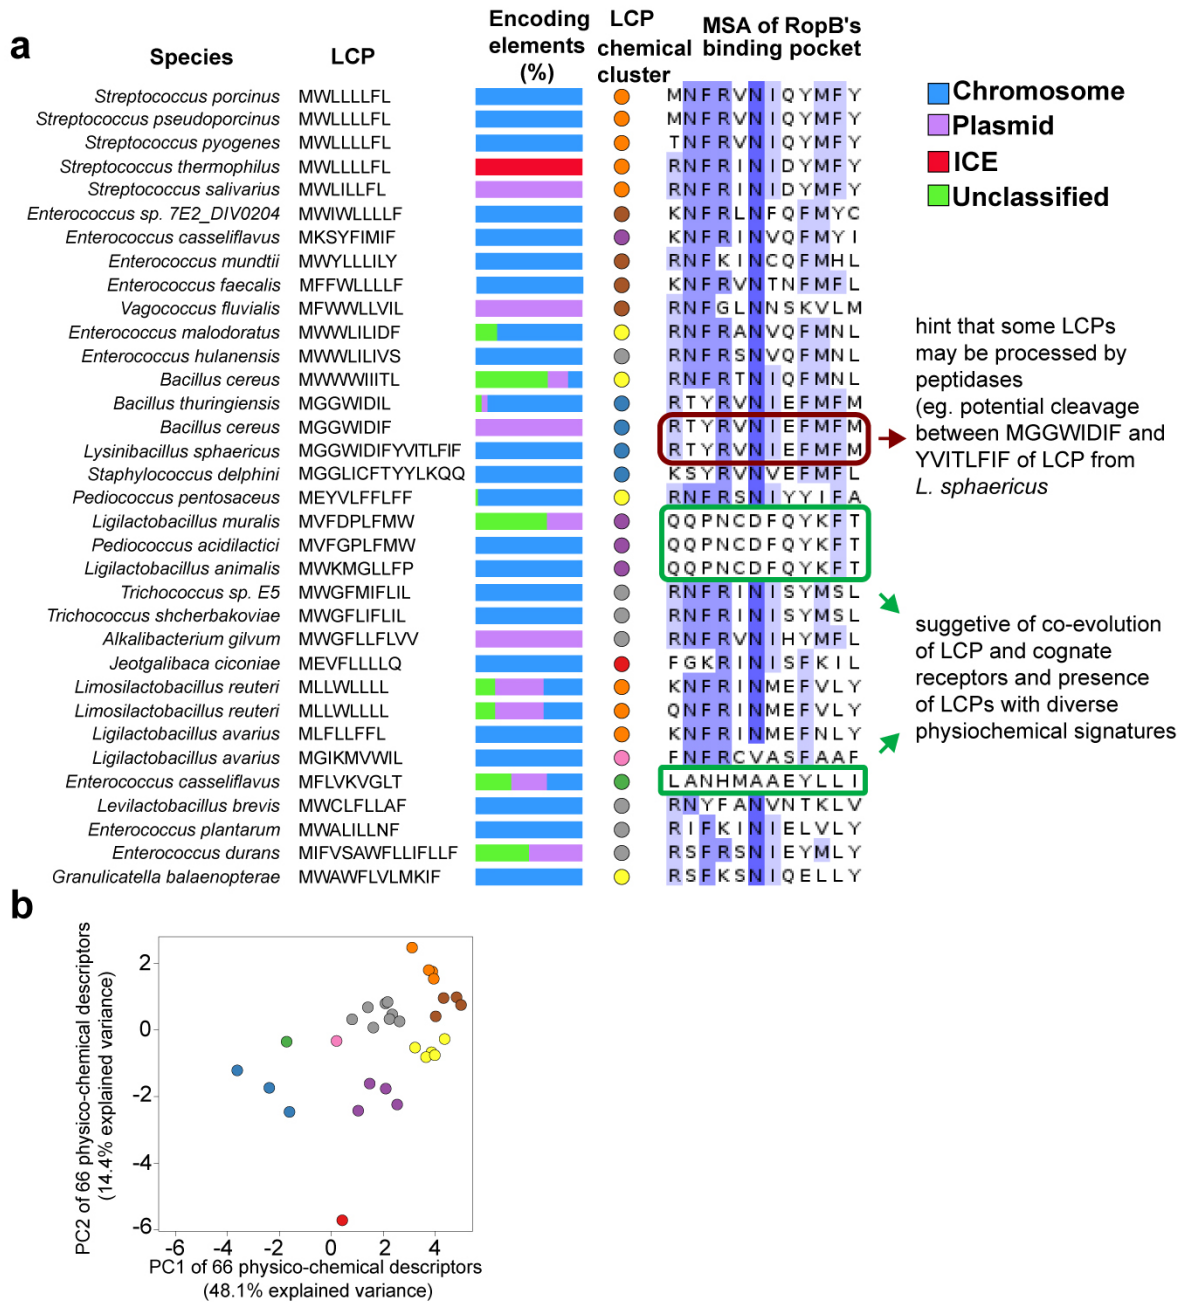

**Supplementary Figure 4. Co-evolution receptor-LCP pairs.** a, Mapping LCP-contacting residues and LCP sequences. Each line corresponds to a candidate receptor-LCP pair of a given species. The corresponding physiochemical cluster of the LCP is highlighted in color (as in panel b), and the LCP-contacting residues are displayed at the right. The LCP-contacting amino-acids are colored according to their conservation level

in the multiple sequence alignment. The green boxes indicate outlier LCP-binding residues, whose cognate LCPs also deviate from the canonical LCP signature in the PCA of peptide chemical descriptors. The red box highlights identical LCP-contacting residues associated with distinct LCPs, which nonetheless harbor an identical region. **b**, PCA of LCP chemical signatures.

## Supplementary Figure 5

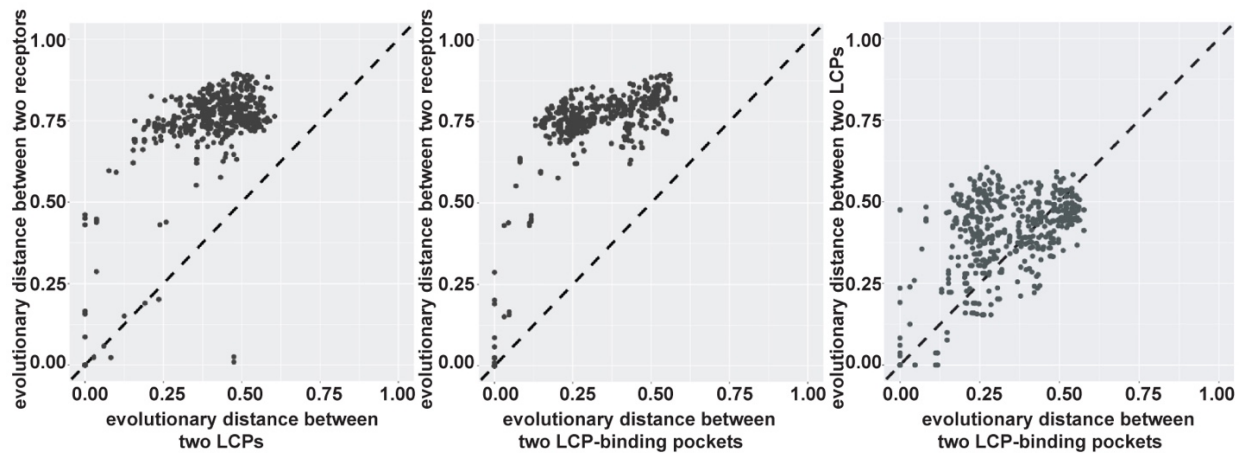

**Supplementary Figure 5.** Comparisons of pairwise evolutionary distances between entire receptors, LCP contacting residues, and predicted LCPs.



Supplementary Figure 6

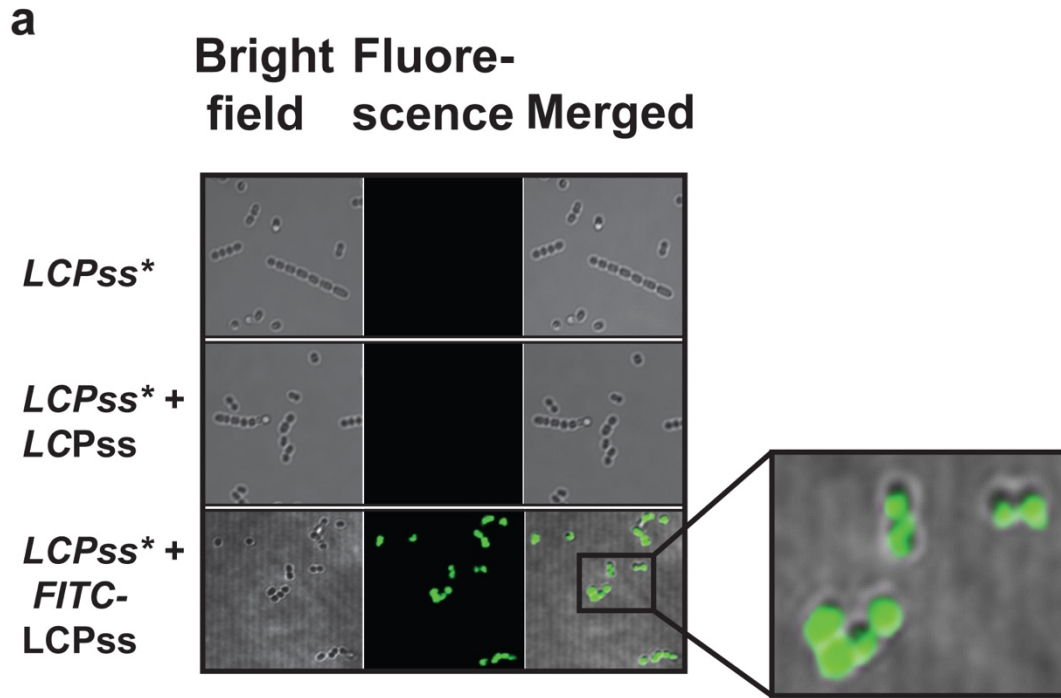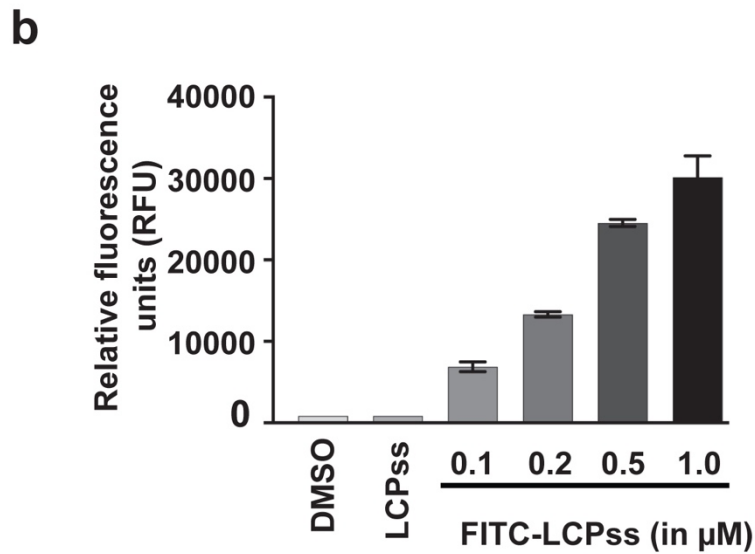

**Supplementary Figure 6. a**, Confocal microscopy images of the *LCP<sub>ss</sub>\** mutant strain either unsupplemented or supplemented with the indicated synthetic peptide. For each sample, bright-field, fluorescence-field, and merged images are shown. Magnified view

of the FITC-LCP<sub>ss</sub>-supplemented growth. **b**, The LCP<sub>ss</sub>\* mutant strain was grown to the late exponential phase ( $A_{600} \sim 2.0$ ) and supplemented with either the indicated synthetic peptide or the carrier for the synthetic peptides (DMSO). Unmodified LCP<sub>ss</sub> was added at a final concentration of 1  $\mu$ M, whereas varying concentrations FITC-LCP<sub>ss</sub> were used. After 30 min of incubation at 37 °C, cells were washed three times with sterile PBS, suspended in PBS, and lysed. Fluorescence measurements were obtained with clarified cell lysates using excitation and emission wavelengths of 480 nm and 520 nm, respectively. The unsupplemented LCP<sub>ss</sub>\* mutant strain was used as a reference, and changes in relative fluorescence units (RFU) relative to the reference are shown.

Supplementary Figure 7

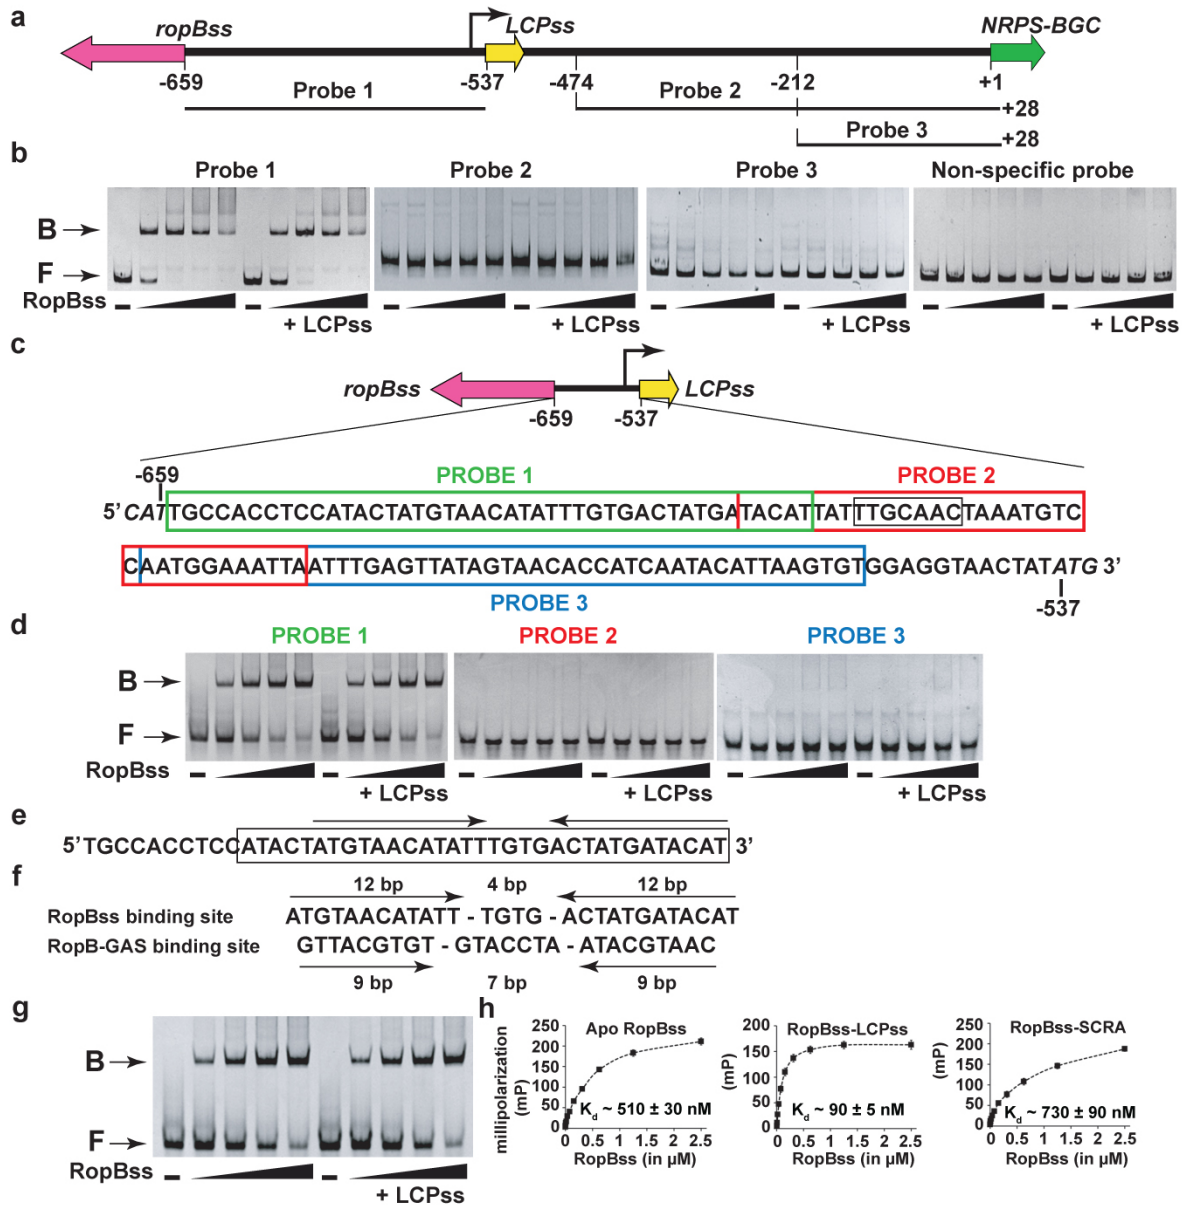

**Supplementary Figure 7.** Analysis of RopB<sub>ss</sub> binding sites within the *ropB<sub>ss</sub>*-*NRPS-BGC* intergenic region. **a**, the *ropB<sub>ss</sub>*, *LCP<sub>ss</sub>*, and *NRPS-BGC* genes are marked by block arrows. The bent arrow above the line indicates the putative transcription start site of *LCP<sub>ss</sub>* (*PLCP<sub>ss</sub>*). Numbers indicate the nucleotide positions relative to the first nucleotide of *NRPS-BGC* start codon. Promoter fragments (probes 1-3) tested for RopB<sub>ss</sub> binding in

the electrophoretic mobility shift assay (EMSA) are shown as bars and the numbers at either side of each probe indicate the positions of 5' and 3' ends of the fragment relative to the first nucleotide of *NRPS-BGC* start codon. **b**, increasing concentrations of purified apo-RopB<sub>SS</sub> and LCP<sub>SS</sub>-bound RopB<sub>SS</sub> (50, 100, 150, and 200 nM of RopB<sub>SS</sub>) were incubated with the indicated probe and reaction mixtures were resolved on a 10% native-PAGE. Synthetic LCP<sub>SS</sub> was added in the reaction mixture at a final concentration of 1 μM to generate LCP<sub>SS</sub>-bound RopB<sub>SS</sub>. The positions of free (F) and RopB<sub>SS</sub>-bound (B) probes are marked. **c**, analysis of RopB<sub>SS</sub> binding sites within the *ropB<sub>SS</sub>-LCP<sub>SS</sub>* intergenic region. The nucleotide sequence within the *ropB<sub>SS</sub>-LCP<sub>SS</sub>* intergenic region is shown and the promoter fragments (probes 1-3) tested for RopB<sub>SS</sub> binding in the EMSA are boxed and shaded in different colors. **d**, increasing concentrations of purified apo-RopB<sub>SS</sub> and LCP<sub>SS</sub>-bound RopB<sub>SS</sub> (50, 100, 150, and 200 nM of RopB<sub>SS</sub>) were incubated with the indicated probe and reaction mixtures were resolved on a 10% native-PAGE. **e**, the nucleotide sequence of RopB<sub>SS</sub> binding site in *PLCP<sub>SS</sub>* and the nucleotide sequence used in the FP studies is boxed. The inverted repeats within the RopB<sub>SS</sub> binding site are marked by arrows above. **f**, comparison of RopB<sub>SS</sub> and RopB-GAS binding sites. The 12-4-12 bp motif in RopB<sub>SS</sub> binding site and 9-7-9 bp motif in RopB-GAS binding site are labeled. **g**, increasing concentrations of purified apo-RopB<sub>SS</sub> and LCP<sub>SS</sub>-bound RopB<sub>SS</sub> (50, 100, 150, and 200 nM of RopB<sub>SS</sub>) were incubated oligoduplex containing the identified RopB-binding site and reaction mixtures were resolved on a 10% native-PAGE. **h**, Analyses of the binding between the FITC-labeled oligoduplex containing the putative RopB<sub>SS</sub>-binding site and apo-RopB<sub>SS</sub>, LCP<sub>SS</sub>-bound, or SCRA-bound RopB<sub>SS</sub>, as assessed by FP assay.

**Supplementary Table 1. Bacterial strains and plasmids used in this study**

| Strain or Plasmid                     | Description                                                                                                                                                                                                                           | Reference                                                                                                                                           |
|---------------------------------------|---------------------------------------------------------------------------------------------------------------------------------------------------------------------------------------------------------------------------------------|-----------------------------------------------------------------------------------------------------------------------------------------------------|
| <b>Strains</b>                        |                                                                                                                                                                                                                                       |                                                                                                                                                     |
| WT<br><i>Streptococcus salivarius</i> | <i>Streptococcus salivarius</i> strain DS85_40B                                                                                                                                                                                       | <a href="https://www.ncbi.nlm.nih.gov/Traces/wgs/JAIQWT01?display=contigs">https://www.ncbi.nlm.nih.gov/Traces/wgs/JAIQWT01?display=contigs</a>     |
| $LCP_{ss}^*$                          | <i>S. salivarius</i> mutant strain that has the start codon of $LCP_{ss}$ changed to stop codon in WT SAL                                                                                                                             | This study                                                                                                                                          |
| $LCP_{ss}^*::LCP_{ss}$                | <i>S. salivarius</i> strain in which the stop codon introduced in the $LCP_{ss}^*$ mutant strain was reversed to start codon                                                                                                          | This study                                                                                                                                          |
| $\Delta ropB_{ss}$                    | <i>S. salivarius</i> mutant strain that has the $ropB_{ss}$ coding region inactivated by marker less deletion in WT SAL                                                                                                               | This study                                                                                                                                          |
| $\Delta ropB_{ss}::ropB_{ss}$         | <i>S. salivarius</i> strain in which the $ropB_{ss}$ coding region was reintroduced in the $\Delta ropB_{ss}$ mutant strain                                                                                                           | This study                                                                                                                                          |
| <i>Enterococcus malodoratus</i>       | <i>Enterococcus malodoratus</i><br>DSM strain number DSM 20681                                                                                                                                                                        | <a href="https://www.dsmz.de/collection/catalogue/details/culture/DSM-20681">https://www.dsmz.de/collection/catalogue/details/culture/DSM-20681</a> |
| <i>Streptococcus porcinus</i>         | <i>Streptococcus porcinus</i><br>DSM strain number DSM 20725                                                                                                                                                                          | <a href="https://www.dsmz.de/collection/catalogue/details/culture/DSM-20725">https://www.dsmz.de/collection/catalogue/details/culture/DSM-20725</a> |
| <i>Limosilactobacillus reuteri</i>    | <i>Limosilactobacillus reuteri</i><br>DSM strain number DSM 32035                                                                                                                                                                     | <a href="https://www.dsmz.de/collection/catalogue/details/culture/DSM-32035">https://www.dsmz.de/collection/catalogue/details/culture/DSM-32035</a> |
| <i>E. coli</i> DH5 $\alpha$           | Host strain for cloning purposes                                                                                                                                                                                                      |                                                                                                                                                     |
| <i>E. coli</i> BL21(DE3)              | Host strain for protein overexpression, <i>F</i> -, <i>ompT</i> , <i>hsdSB</i> ( <i>rB</i> - <i>mB</i> -), <i>gal</i> ( $\lambda$ <i>c I</i> 857, <i>ind1</i> , <i>Sam7</i> , <i>nin5</i> , <i>lacUV-T7 gene1</i> ), <i>dcm</i> (DE3) |                                                                                                                                                     |
| <b>Plasmids</b>                       |                                                                                                                                                                                                                                       |                                                                                                                                                     |

|                                 |                                                                                                                                                                                                        |            |
|---------------------------------|--------------------------------------------------------------------------------------------------------------------------------------------------------------------------------------------------------|------------|
| <i>pJL</i>                      | Low-copy number plasmid capable of replication in <i>Escherichia coli</i> , but a suicide vector in streptococcus. Chloramphenicol resistant. Used to generate isoallelic <i>S. salivarius</i> mutants | (5)        |
| <i>pET28a</i>                   | Overexpression vector for N-terminally hexahistidine tagged recombinant proteins, KmR                                                                                                                  | Novagen    |
| <i>pET28a-ropB<sub>ss</sub></i> | pET28a carries <i>ropB<sub>ss</sub></i> gene for overexpression of N-terminally hexahistidine tagged recombinant <i>ropB<sub>ss</sub></i>                                                              | This study |



**Supplementary table 2. Primers used in this study**

| Primer                | Sequence 5' – 3'                                                                    | Purpose                                                                                                |
|-----------------------|-------------------------------------------------------------------------------------|--------------------------------------------------------------------------------------------------------|
| $\Delta ropB_{ss}$ A  | GTATCGATAAGCTTGATATCGAATTCCTGC<br>AGCCCGGGGATCTCCCATAGCTTTATTA<br>AACGAAAATTTCTTTAC | 5' primer for 5' region of <i>ropB<sub>ss</sub></i> to delete <i>ropB<sub>ss</sub></i>                 |
| $\Delta ropB_{ss}$ B  | GGATGAAATTAATGCATAAATGAAGATGAT<br>CGATTGCTTGTC                                      | 3' primer for 5' region of <i>ropB<sub>ss</sub></i> to delete <i>ropB<sub>ss</sub></i>                 |
| $\Delta ropB_{ss}$ C  | GGACAAGCAATCGATCATCTTCATTTATGC<br>ATTAATTTTCATCC                                    | 5' primer for 3' region of <i>ropB<sub>ss</sub></i> to delete <i>ropB<sub>ss</sub></i>                 |
| $\Delta ropB_{ss}$ D  | GGGATTTTGGTCATGAGATTATCAAAAAG<br>GATCGATATGTCAGGAGCCTATATGCCAC<br>TAG               | 3' primer for 3' region of <i>ropB<sub>ss</sub></i> to delete <i>ropB<sub>ss</sub></i>                 |
| $LCP_{ss}^*$ A        | CAATACATTAAGTGTGGAGGTA ACTATTAG<br>TGGTTGATTTTACTATTTCTTTGA                         | 5' primer of <i>LCP<sub>ss</sub></i> to change the <i>LCP<sub>ss</sub></i> start codon to stop codon   |
| $LCP_{ss}^*$ B        | TCAAAGAAATAGTAAAATCAACCACTAATA<br>GTTACCTCCACACTTAATGTATTG                          | 3' primer of <i>LCP<sub>ss</sub></i> to change the <i>LCP<sub>ss</sub></i> start codon to stop codon   |
| $\Delta oppAD_{ss}$ A | GTCAATTTACTTGGCAAAGA                                                                | 5' primer for 5' region of <i>oppA</i> to delete <i>oppAD<sub>ss</sub></i>                             |
| $\Delta oppAD_{ss}$ B | GTTATAGTTATTATAACATGTATTGATGGT<br>TGTGTATAGA                                        | 3' primer for 5' region of <i>oppA</i> to delete <i>oppAD<sub>ss</sub></i>                             |
| $\Delta oppAD_{ss}$ C | TCTATACACAACCATCAATACATGTTATAA<br>TAACTATAAC                                        | 5' primer for <i>spc</i> along with <i>oppAss</i> overlap sequence to delete <i>oppAD<sub>ss</sub></i> |
| $\Delta oppAD_{ss}$ D | CATCCGGATGACAAGCCA                                                                  | 3' primer for 5' region of <i>oppD<sub>ss</sub></i> to delete <i>oppAD<sub>ss</sub></i>                |

|                                       |                                                           |                                                                                             |
|---------------------------------------|-----------------------------------------------------------|---------------------------------------------------------------------------------------------|
| $\Delta oppAD_{ss}$<br>spcF           | TCGCGAGCCGATAATATTACTTATAATTTT<br>TTTAATCTGTTATTTAAATAG   | 5' primer for <i>spc</i> along with <i>oppDss</i> overlap sequence to delete <i>oppADss</i> |
| $\Delta oppAD_{ss}$<br>spcR           | CTATTTAAATAACAGATTAATAAAAAATTATAA<br>GTAATATTATCGGCTCGCGA | 3' primer for <i>spc</i> along with <i>oppDss</i> overlap sequence to delete <i>oppADss</i> |
| <i>S. porcinus</i><br>speB_qRT Fwd    | TGCGTGAAATTTGGTGAACAG                                     | 5' primer for <i>S. porcinus</i> <i>speB</i> qRT-PCR                                        |
| <i>S. porcinus</i><br>speB_qRT Rev    | ATATGGACTACGGCCCATCTA                                     | 3' primer for <i>S. porcinus</i> <i>speB</i> qRT-PCR                                        |
| <i>S. porcinus</i><br>tufA_qRT Fwd    | GGACACGCGGACTATGTTAAA                                     | 5' primer for <i>S. porcinus</i> reference gene <i>tufA</i> qRT-PCR                         |
| <i>S. porcinus</i><br>tufA_qRT Rev    | AGGATGTGCTCACGAGTTTG                                      | 3' primer for <i>S. porcinus</i> reference gene <i>tufA</i> qRT-PCR                         |
| <i>E. malodoratus</i><br>16S qRT Fwd  | CATCCCTTGACGGTATCTAACC                                    | 5' primer for <i>E. malodoratus</i> reference gene 16S <i>rRNA</i> qRT-PCR                  |
| <i>E. malodoratus</i><br>16S qRT Rev  | CTCGCTTTACGCCCAATAAATC                                    | 3' primer for <i>E. malodoratus</i> reference gene 16S <i>rRNA</i> qRT-PCR                  |
| <i>E. malodoratus</i><br>T7SS qRT Fwd | ACGATGTGTGGGTCTCTTTATC                                    | 5' primer for <i>E. malodoratus</i> T7SS qRT-PCR                                            |

|                                                         |                         |                                                                                               |
|---------------------------------------------------------|-------------------------|-----------------------------------------------------------------------------------------------|
| <i>E. malodoratus</i><br>T7SS qRT Rev                   | TCAACGAATCGTGCAGATGTA   | 3' primer for <i>E. malodoratus</i> T7SS qRT-PCR                                              |
| <i>E. malodoratus</i><br>T7-eff qRT Fwd                 | GTGACAAAGTCTCTGCCCAATA  | 5' primer for <i>E. malodoratus</i> T7-eff qRT-PCR                                            |
| <i>E. malodoratus</i><br>T7-eff qRT Rev                 | GAGGATCAAACCTTCGCAGGTAA | 3' primer for <i>E. malodoratus</i> T7-eff qRT-PCR                                            |
| <i>E. malodoratus</i><br>hypothetical<br>gene 1 qRT Fwd | CTAGCAGCTCTTCCATTTGTTTC | 5' primer for <i>E. malodoratus</i> gene 1 rRNA qRT-PCR                                       |
| <i>E. malodoratus</i><br>hypothetical<br>gene 1 qRT Rev | CATAGAATTGACCTTGCGAATCG | 3' primer for <i>E. malodoratus</i> gene 1 rRNA qRT-PCR                                       |
| <i>L. reuteri tufA</i><br>qRT Fwd                       | GAAGGTGACCCAGAACAAGAA   | 5' primer for <i>L. reuteri tufA</i> qRT-PCR with the locus tag A4V07_02000                   |
| <i>L. reuteri tufA</i><br>qRT Rev                       | CATGAATGGCTTGTCAGTAGGA  | 3' primer for <i>L. reuteri tufA</i> qRT-PCR with the locus tag A4V07_02000                   |
| <i>L. reuteri</i> ABC<br>transporter gene<br>1 qRT Fwd  | CAAGTTGGTGTCGTCAGTGATA  | 5' primer for <i>L. reuteri</i> ABC transporter gene 1 qRT-PCR with the locus tag A4V07_07970 |
| <i>L. reuteri</i> ABC<br>transporter gene<br>1 qRT Rev  | CATAGAATTGACCTTGCGAATCG | 3' primer for <i>L. reuteri</i> ABC transporter gene 1 qRT-PCR with the locus tag A4V07_07970 |
